# Supplementary material for: Repeatable fluorescence switcher of Eu3+-doped CeO2nanorods byl(+)-ascorbic acid and hydrogen peroxide
Source: Royal Society of Chemistry journal article supplement (doi:10.1039/c4tc01597e), 2014-09-02
Supplement: c4tc01597e1.pdf [file c4tc01597e1.pdf]

Electronic Supplementary Material (ESI) for Journal of Materials Chemistry C  
This journal is (c) The Royal Society of Chemistry 2012

## Repeatable fluorescence switcher of $\text{Eu}^{3+}$ -doped $\text{CeO}_2$ nanorods by $\text{L}(+)\text{-ascorbic acid}$ and hydrogen peroxide

Wei Gao,<sup>a</sup> Jing Li,<sup>a</sup> Xuemei Zhou,<sup>a</sup> Zhiyun Zhang,<sup>a</sup> Yuanyuan Ma,<sup>\* a,b</sup> and Yongquan Qu<sup>\*a,b</sup>

<sup>a</sup> Center for Applied Chemical Research, Frontier Institute of Science and Technology, Xi'an Jiaotong University, Xi'an, 710049, P. R. China.

<sup>b</sup> Institute of Chemistry for New Energy Materials, Department of Chemistry, Xi'an Jiaotong University, Xi'an, 710049, P. R. China.

\*To whom correspondence should be addressed. E-mail: yongquan@mail.xjtu.edu.cn; yyma@mail.xjtu.edu.cn. Tel: +86-29-83395357.

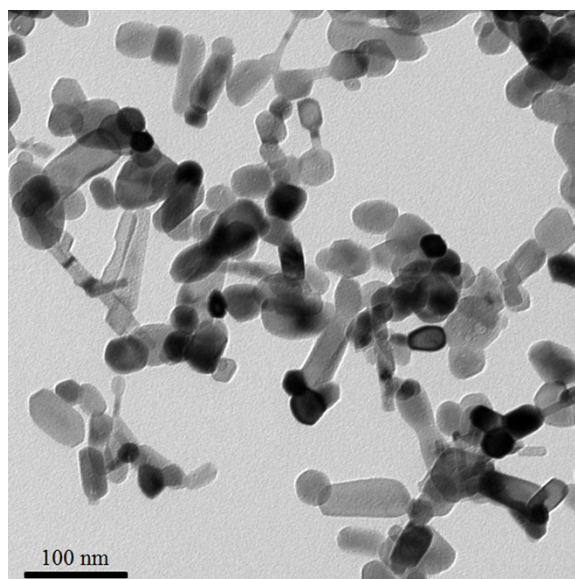

Fig. S1 TEM image of 1%  $\text{Eu}^{3+}$ -doped  $\text{CeO}_2$  calcined at 900 °C in air for 2 hours.

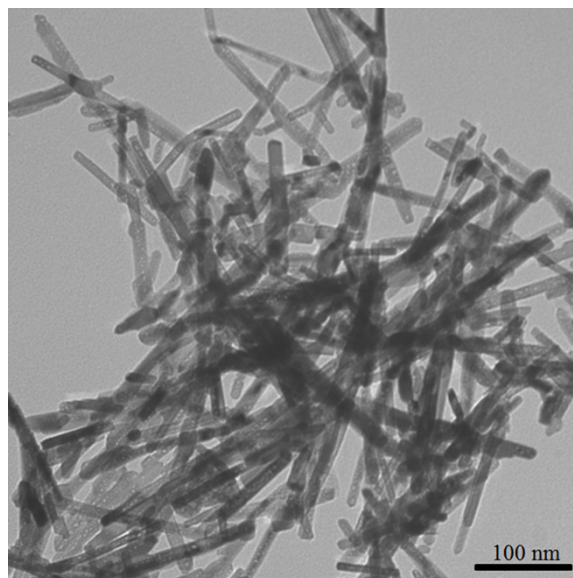

Fig. S2 TEM image of 1%  $\text{Eu}^{3+}$ -doped  $\text{CeO}_2$  after treated by ascorbic acid and  $\text{H}_2\text{O}_2$  (with the final concentrations of 2 mM and 1 mM, respectively) alternatively for 4 cycles.

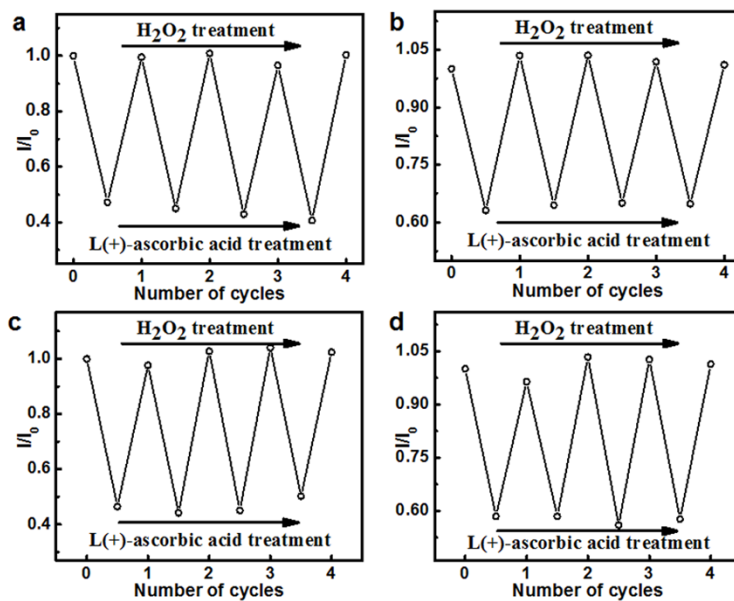

Fig. S3 The stability tests of (a) 0.5%, (b) 2.5%, (c) 5% and (d) 10%  $\text{Eu}^{3+}$ -doped  $\text{CeO}_2$  treated by ascorbic acid with the final concentration of 2 mM and  $\text{H}_2\text{O}_2$  with the final concentration of 1 mM alternatively for 4 cycles.
